# Supplementary material for: Ratiometric Colorimetric Detection of Nitrite Realized by Stringing Nanozyme Catalysis and Diazotization Together
Source: MDPI journal article supplement (doi:10.3390/bios11080280), 2021-08-18
Supplement: s1 [file s1]

*Supplementary Information*

# Ratiometric Colorimetric Detection of Nitrite Realized by Stringing Nanozyme Catalysis and Diazotization Together

Mengzhu Wang <sup>1</sup>, Peng Liu <sup>1</sup>, Hengjia Zhu <sup>2</sup>, Bangxiang Liu <sup>1</sup> and Xiangheng Niu <sup>1,2,3,4,\*</sup>

<sup>1</sup> Institute of Green Chemistry and Chemical Technology, School of Chemistry and Chemical Engineering, Jiangsu University, Zhenjiang 212013, China; wangmengzhu2018@126.com (M.W.); lp18852858622@163.com (P.L.); lbx15912338469@163.com (B.L.)

<sup>2</sup> School of Agricultural Engineering, Jiangsu University, Zhenjiang 212013, China; 18260622650@163.com

<sup>3</sup> Key Laboratory of Functional Molecular Solids, Ministry of Education, Anhui Normal University, Wuhu 241002, China

<sup>4</sup> State Key Laboratory of Urban Water Resource and Environment, Harbin Institute of Technology, Harbin 150090, China

\* Correspondence: niuxiangheng@ujs.edu.cn

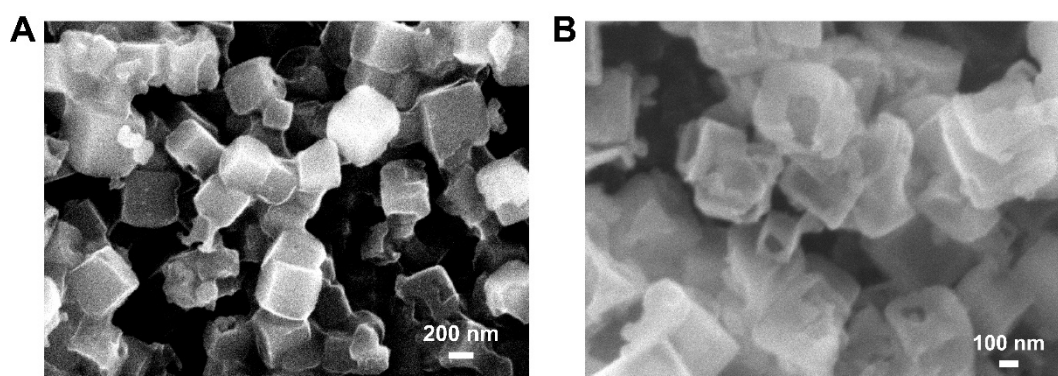

Figure S1. SEM images of Mn-Fe PBA (A) and hollow Mn-Fe PBA (B).

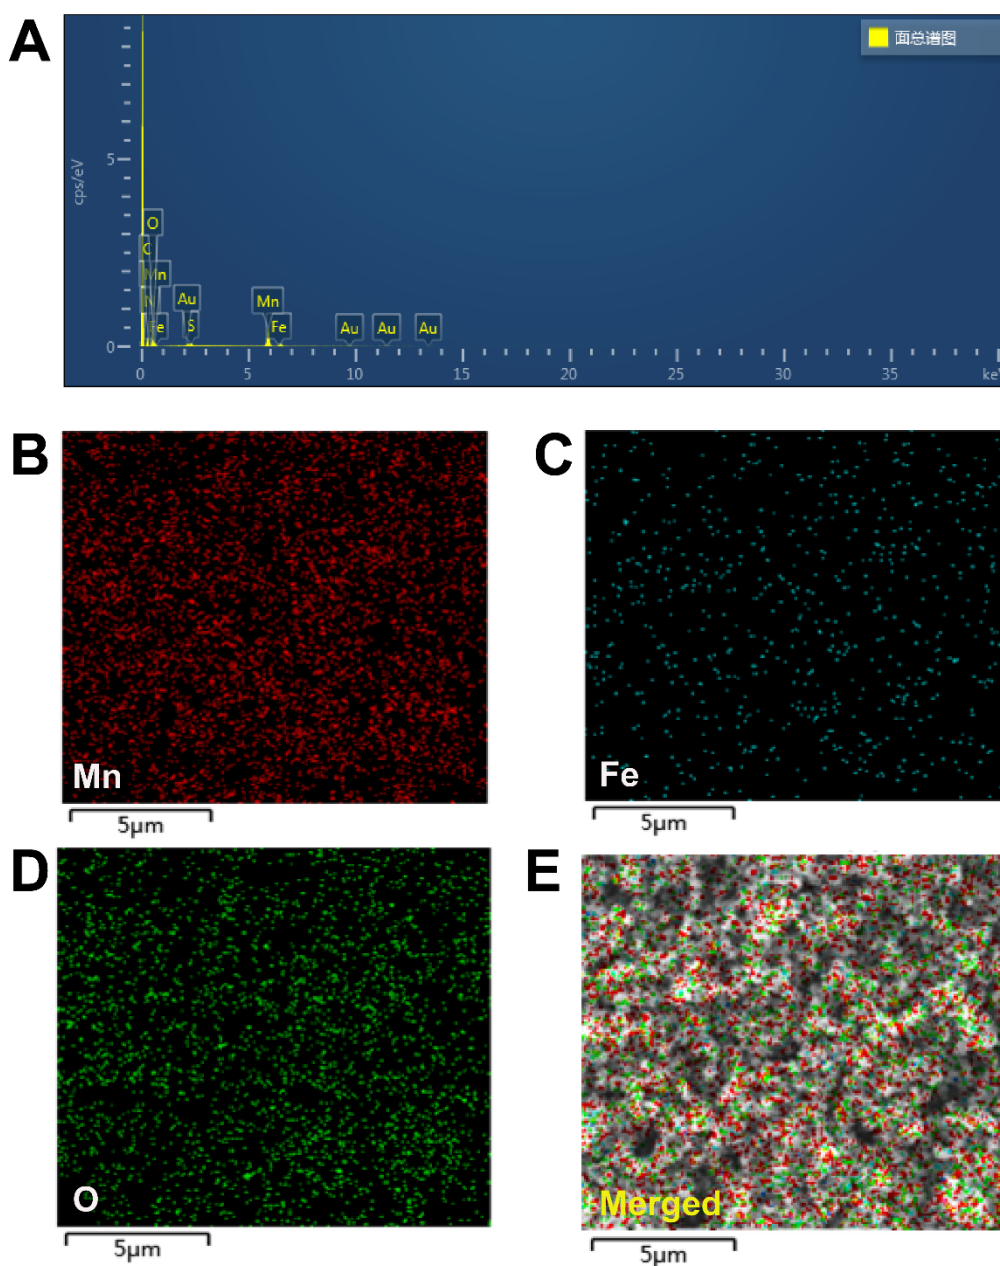

Figure S2. EDS (A) and elemental mapping images (B–E) of hollow MnFeO.

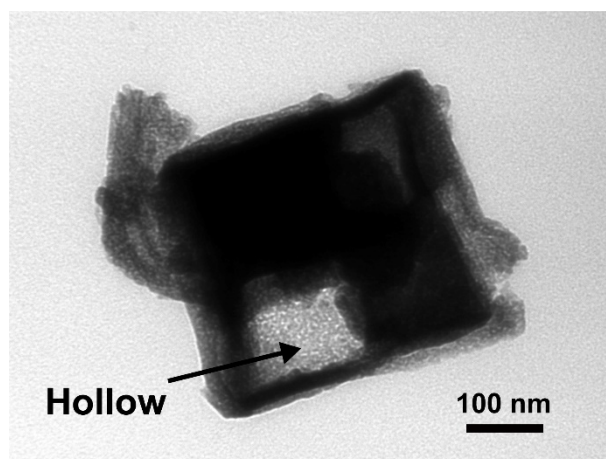

Figure S3. TEM image of hollow MnFeO.

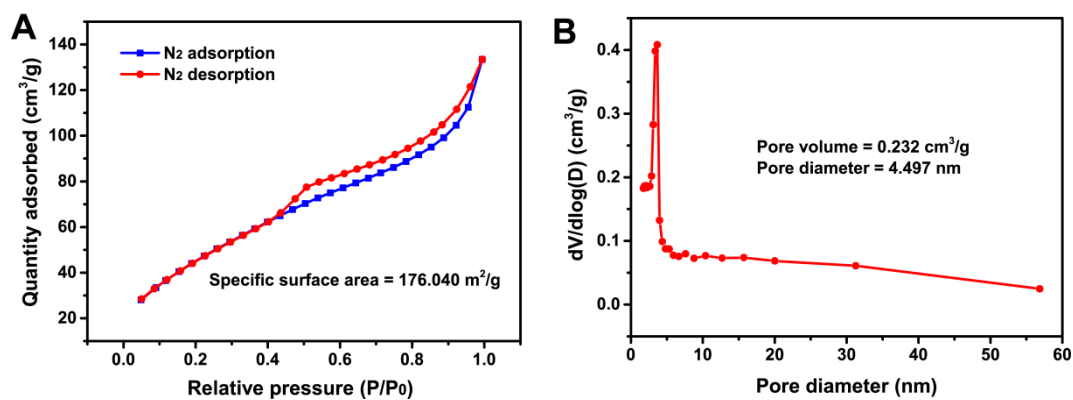Figure S4.  $\text{N}_2$  adsorption/desorption curves (A) of hollow MnFeO and its pore size distribution (B).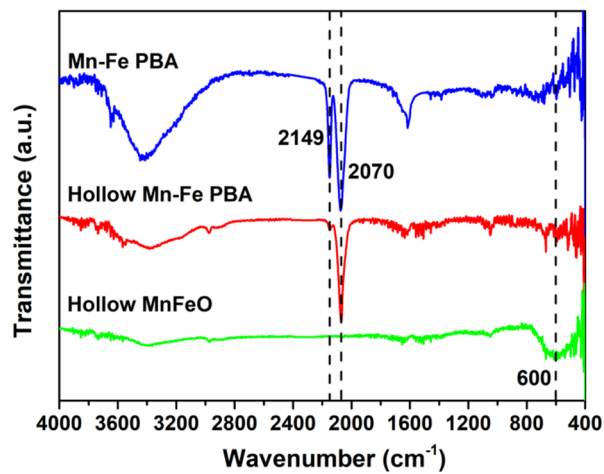

Figure S5. Comparison of FTIR spectra of different materials.

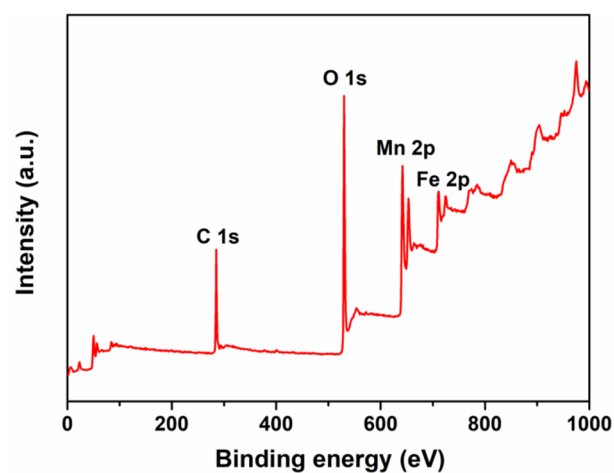

Figure S6. Full XPS of hollow MnFeO.

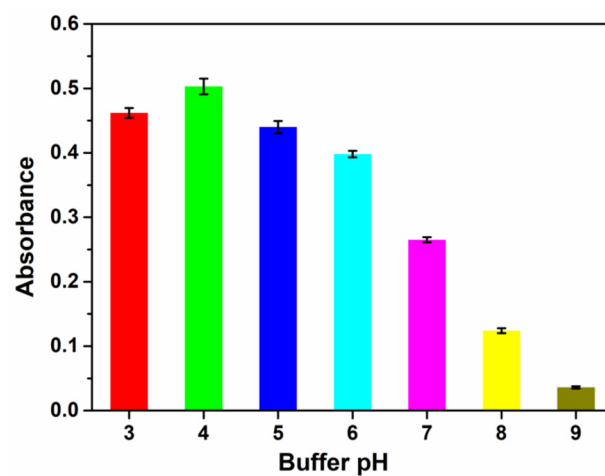

Figure S7. Effect of buffer pH on hollow MnFeO catalyzing the TMB chromogenic reaction.

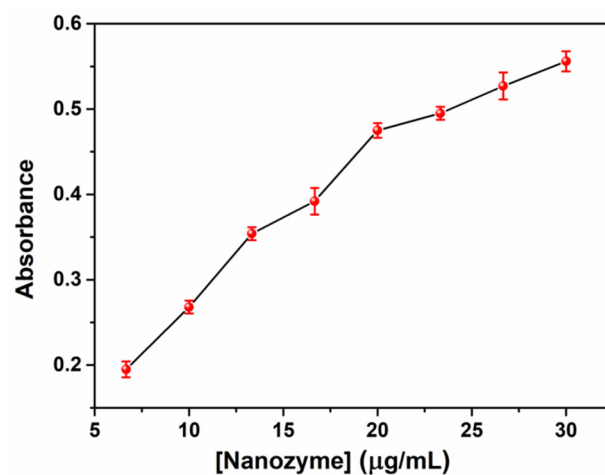

Figure S8. The absorbance (652 nm) of the hollow MnFeO+TMB system increases along with the amount of hollow MnFeO used.

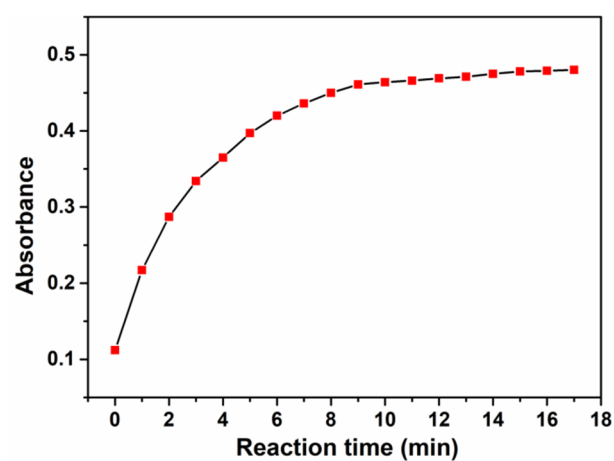

Figure S9. Absorbance (652 nm) change of the hollow MnFeO+TMB system over reaction time.

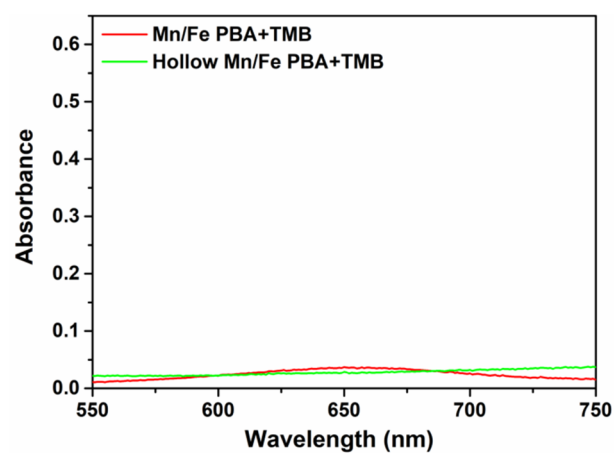

Figure S10. Neither Mn-Fe PBA nor hollow Mn-Fe PBA shows oxidase-like activity to catalyze the TMB chromogenic reaction.

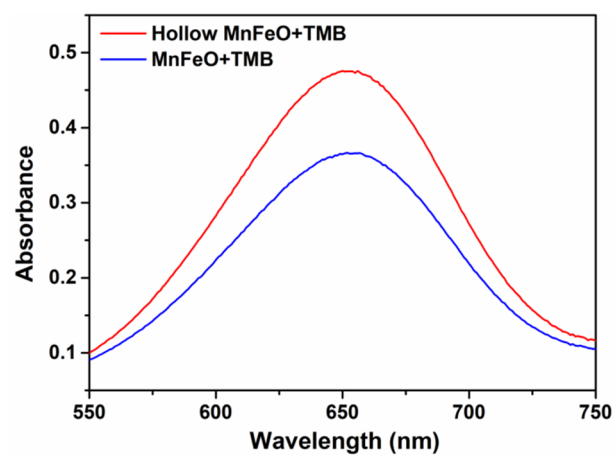

Figure S11. Oxidase-like activity comparison of MnFeO and hollow MnFeO catalyzing the TMB chromogenic reaction.

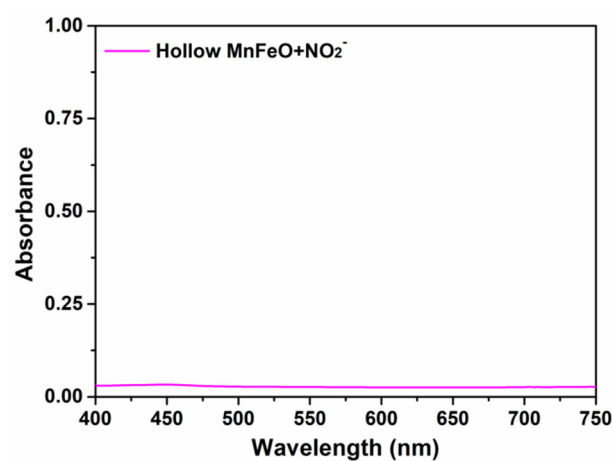

Figure S12. No chromogenic reaction occurs between hollow MnFeO and nitrite.

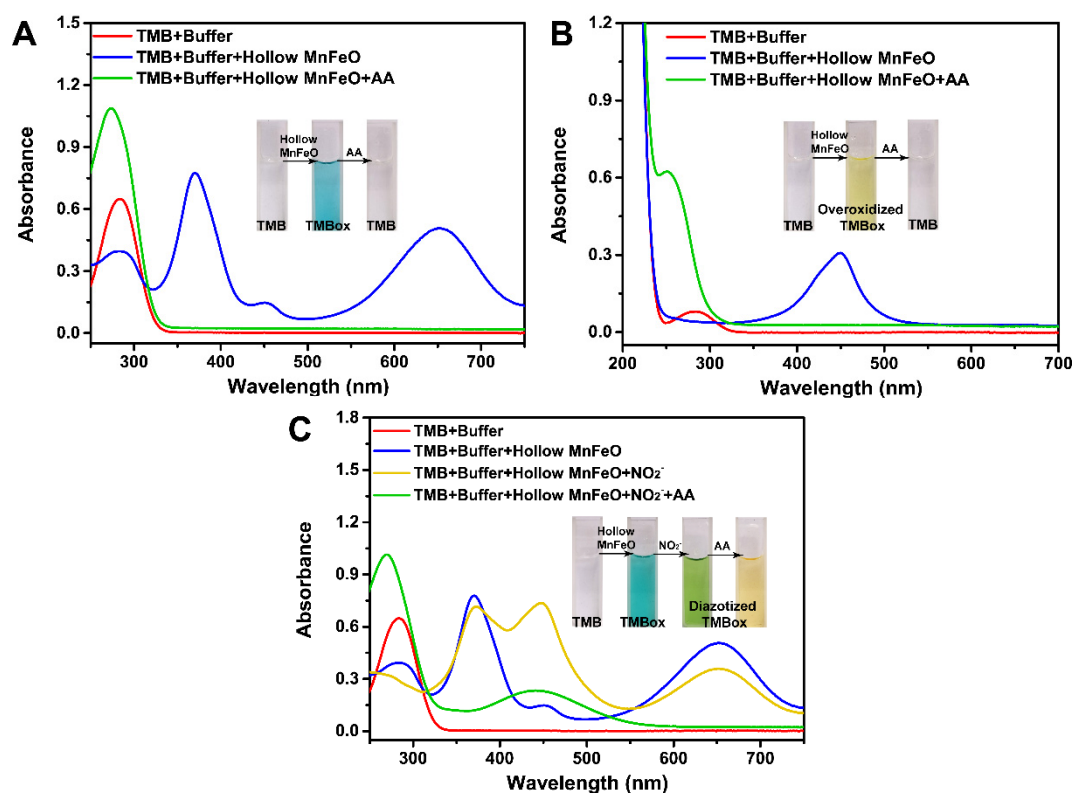

Figure S13. Ascorbic acid (AA) can re-reduce blue TMBox and yellow overoxidized TMBox to colorless TMB, while it cannot re-reduce diazotized TMBox to colorless TMB (the concentrations of nitrite and AA are 100  $\mu\text{M}$ ).

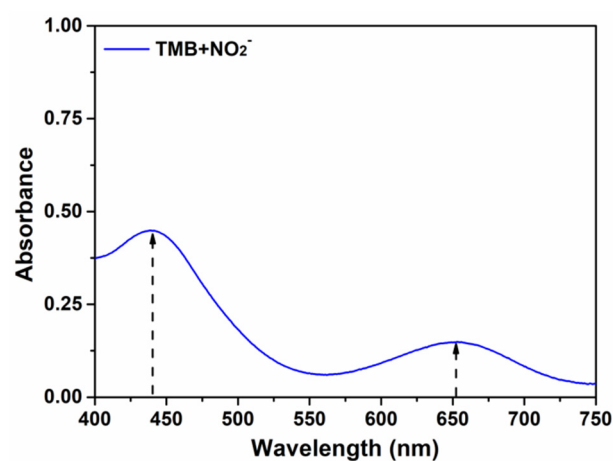

Figure S14. Nitrite can trigger the oxidation and diazotization of TMB (the concentration of nitrite is 100  $\mu$ M).

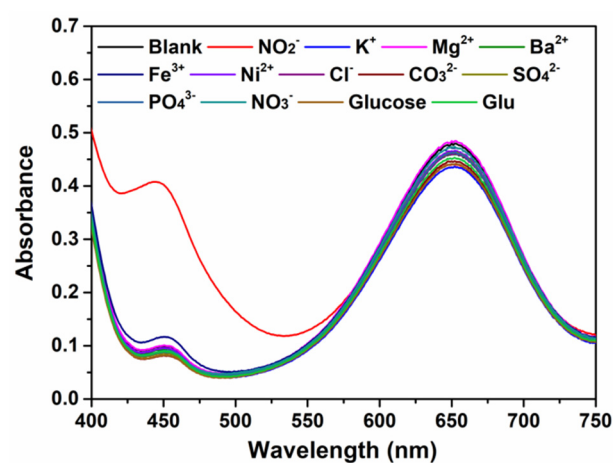

Figure S15. Response comparison of various species toward the hollow MnFeO+TMB system (the concentrations of various species are 50  $\mu$ M).

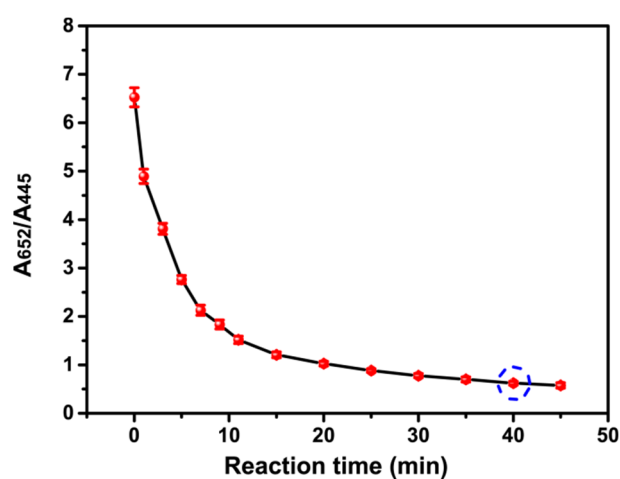

Figure S16. Change of the ratiometric colorimetric signal over the reaction time of TMB and nitrite.

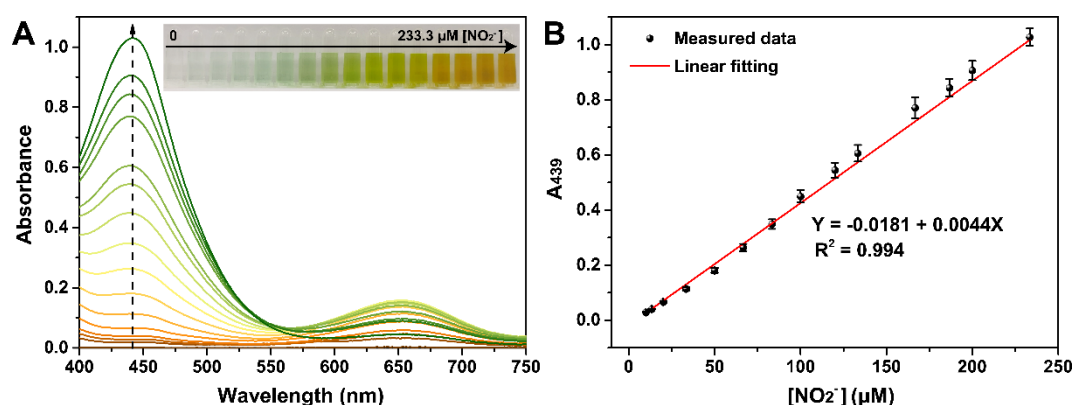

**Figure S17.** (A) displays UV-vis spectra of the TMB+NO<sub>2</sub><sup>-</sup> system with nitrite at various levels (the concentration of nitrite increases from 0 μM to 233.3 μM), and (B) shows the linear relationship between absorbance (439 nm) and nitrite concentration.

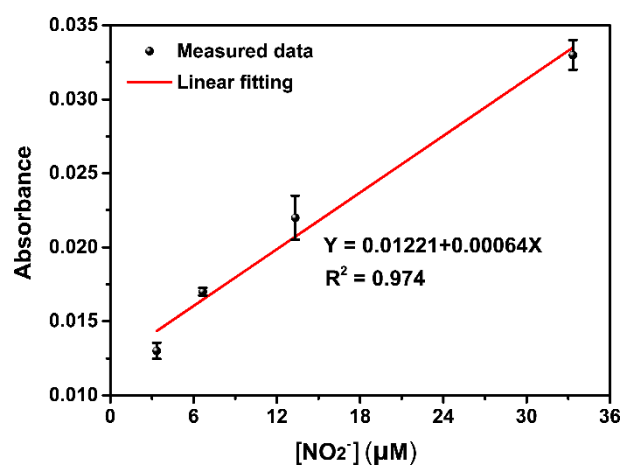

**Figure S18.** The linear relationship between absorbance (540 nm) and nitrite concentration obtained by the commercial kit.

**Table S1.** Comparison of kinetic parameters of oxidase-mimicking hollow MnFeO catalyzing the TMB oxidation reaction with that of other oxidase mimics.

| Material                              | Substrate | $K_m$ (mM) | $V_{max}$ ( $\times 10^{-7}$ , M/s) | Reference |
|---------------------------------------|-----------|------------|-------------------------------------|-----------|
| Hollow MnFeO                          | TMB       | 0.27       | 4.23                                | Our work  |
| CeO <sub>2</sub>                      | TMB       | 0.8-3.8    | 0.03-0.07                           | [1]       |
| Pt nanoclusters                       | TMB       | 0.63       | 27                                  | [2]       |
| OV-Mn <sub>3</sub> O <sub>4</sub> NFs | TMB       | 1.66       | 0.397                               | [3]       |
| Ag <sub>3</sub> PO <sub>4</sub>       | TMB       | 0.255      | 0.826                               | [4]       |
| Fe-N/C                                | TMB       | 0.94       | 5.98                                | [5]       |

**Table S2.** Comparison of our ratiometric colorimetric assay with previously reported methods using TMB as a reagent for nitrite detection.

| Principle                                           | Detection Mode           | Detection Range ( $\mu\text{M}$ ) | LOD ( $\mu\text{M}$ ) | Ref.     |
|-----------------------------------------------------|--------------------------|-----------------------------------|-----------------------|----------|
| Oxidase-like catalysis                              | Colorimetric             | 10-500                            | 2                     | [6]      |
|                                                     | Electrochemical          | 2.5-5700                          | 0.7                   |          |
| Nitrite reductase-like catalysis                    | Colorimetric             | 100-5000                          | 4.6                   | [7]      |
| Diazo-coupling                                      | Colorimetric             | 1-75                              | 0.73                  | [8]      |
| Oxidation                                           | Colorimetric             | 10-440                            | 2.34                  | [9]      |
| Diazotization                                       | Colorimetric             | 10-233.3                          | 0.9                   | Our work |
| Cascade of oxidase-like catalysis and diazotization | Ratiometric colorimetric | 3.3-133.3                         | 0.2                   |          |

**Table S3.** Comparison of our ratiometric colorimetric assay with previously reported nitrite detection methods.

| Principle                                           | Detection Mode                 | Detection Range ( $\mu\text{M}$ ) | LOD ( $\mu\text{M}$ ) | Detection Time (min) | Ref.     |
|-----------------------------------------------------|--------------------------------|-----------------------------------|-----------------------|----------------------|----------|
| Reduction                                           | Colorimetric                   | 0-30                              | 0.1                   | 90                   | [10]     |
| Self-coupling diazotization                         | Colorimetric                   | 2-40                              | 0.12                  | 100                  | [11]     |
| Diazo-coupling                                      | Colorimetric                   | 0.3-22                            | 0.149                 | 35                   | [12]     |
| Diazo-coupling                                      | Colorimetric                   | 22-30                             | 22                    | 25                   | [13]     |
| Reduction                                           | Fluorescent                    | 0-60                              | 0.07                  | 5                    | [14]     |
| Diazotization                                       | Fluorescent                    | 0.05-10                           | 0.012                 | 30                   | [15]     |
| Diazo-coupling                                      | Thread-based analytical device | 50-1000                           | 25                    | 50                   | [16]     |
| Cascade of oxidase-like catalysis and diazotization | Ratiometric colorimetric       | 3.3-133.3                         | 0.2                   | 55                   | Our work |

## References

1. A. Asati, S. Santra, C. Kaittanis, S. Nath, J.M. Perez, Oxidase-like activity of polymer-coated cerium oxide nanoparticles, *Angew. Chem. Int. Ed.* 48 (2009) 2308-2312.
2. C.J. Yu, T.H. Chen, J.Y. Jiang, W.L. Tseng, Lysozyme-directed synthesis of platinum nanoclusters as a mimic oxidase, *Nanoscale* 6 (2014) 9618-9624.
3. W.H. Lu, J. Chen, L.S. Kong, F. Zhu, Z.Y. Feng, J.H. Zhan, Oxygen vacancies modulation  $\text{Mn}_3\text{O}_4$  nanozyme with enhanced oxidase-mimicking performance for L-cysteine detection, *Sens. Actuators B Chem.* 333 (2021) 129560.
4. P. Liu, X. Li, X.C. Xu, X.H. Niu, M.Z. Wang, H.J. Zhu, J.M. Pan, Analyte-triggered oxidase-mimetic activity loss of  $\text{Ag}_3\text{PO}_4/\text{UiO}-66$  enables colorimetric detection of malathion completely free from bioenzymes, *Sens. Actuators B Chem.* 338 (2021) 129866.
5. Q.M. Chen, S.Q. Li, Y. Liu, X.D. Zhang, Y. Tang, H.X. Chai, Y.M. Huang, Size-controllable Fe-N/C single-atom nanozyme with exceptional oxidase-like activity for sensitive detection of alkaline phosphatase, *Sens. Actuators B Chem.* 305 (2020) 127511.
6. L. Liu, J. Du, W.E. Liu, Y.L. Guo, G.F. Wu, W.N. Qi, X.Q. Lu, Enhanced  $\text{His@AuNCs}$  oxidase-like activity by reduced graphene oxide and its application for colorimetric and electrochemical detection of nitrite, *Anal. Bioanal. Chem.* 411 (2019) 2189-2200.
7. O. Adegoke, S. Zolotovskaya, A. Abdolvand, N.N. Daeid, Rapid and highly selective colorimetric detection of nitrite based on the catalytic-enhanced reaction of mimetic Au nanoparticle- $\text{CeO}_2$  nanoparticle-graphene oxide hybrid nanozyme, *Talanta* 224 (2021) 121875.
8. Y.Y. Chen, C.X. Zhao, G.Z. Yue, Z.P. Yang, Y.Y. Wang, H.B. Rao, W. Zhang, B. Jin, X.X. Wang, A highly selective chromogenic probe for the detection of nitrite in food samples, *Food Chem.* 317 (2020) 126361.
9. H.H. Wang, X. Jing, X.Y. Bi, B. Bai, X.W. Wang, Quantitative detection of nitrite in food samples based on digital image colourimetry by smartphone, *ChemistrySelect* 5 (2020) 9952-9956.
10. J.Y. Du, M.X. Zhao, W. Huang, Y.Q. Deng, Y. He, Visual colorimetric detection of tin(II) and nitrite using a molybdenum oxide nanomaterial-based three-input logic gate, *Anal. Bioanal. Chem.* 410 (2018) 4519-4526.
11. H.H. Wang, N.W. Wan, L. Ma, Z.Q. Wang, B.D. Cui, W.Y. Han, Y.Z. Chen, A novel and simple spectrophotometric method for detection of nitrite in water, *Analyst* 143 (2018) 4555-4558.

12. M.H. Ibrahim, Z.H. Xue, H.I. Abdu, M.I. Shinger, A.M. Idris, M.M. Edris, D.L. Shan, X.Q. Lu, Sensitive and selective colorimetric nitrite ion assay using silver nanoparticles easily synthesized and stabilized by AHNDMS and functionalized with PABA, *Nanoscale Adv.* 1 (2019) 1207-1214.
13. W.L. Daniel, M.S. Han, J.S. Lee, C.A. Mirkin, Colorimetric nitrite and nitrate detection with gold nanoparticle probes and kinetic end points, *J. Am. Chem. Soc.* 131 (2009) 6362-6363.
14. K. Chaiendoo, K. Ngamdee, W. Limbut, C. Saiyasombat, W. Busayaporn, S. Ittisanronnachai, V. Promarak, K. Promsuwan, P. Thavarungkul, P. Kanatharana, W. Ngeontae, Gold nanoparticle-based cascade reaction-triggered fluorogenicity for highly selective nitrite ion detection in forensic samples, *Microchem. J.* 168 (2021) 106470.
15. M.C. Rong, D.R. Wang, Y.Y. Li, Y.Z. Zhang, H.Y. Huang, R.F. Liu, X.Z. Deng, Green-emitting carbon dots as fluorescent probe for nitrite detection, *J. Anal. Test.* 5 (2021) 51-59.
16. P. Singhapphan, F. Unob. Thread-based platform for nitrite detection based on a modified Griess assay, *Sens. Actuators B Chem.* 327 (2021) 128938.
